# Supplementary material
Source: MDPI journal article supplement (https://www.mdpi.com/2311-7524/9/12/1330)
Supplement: s1 [file s1 › horticulturae-2712872-supplementary.pdf]

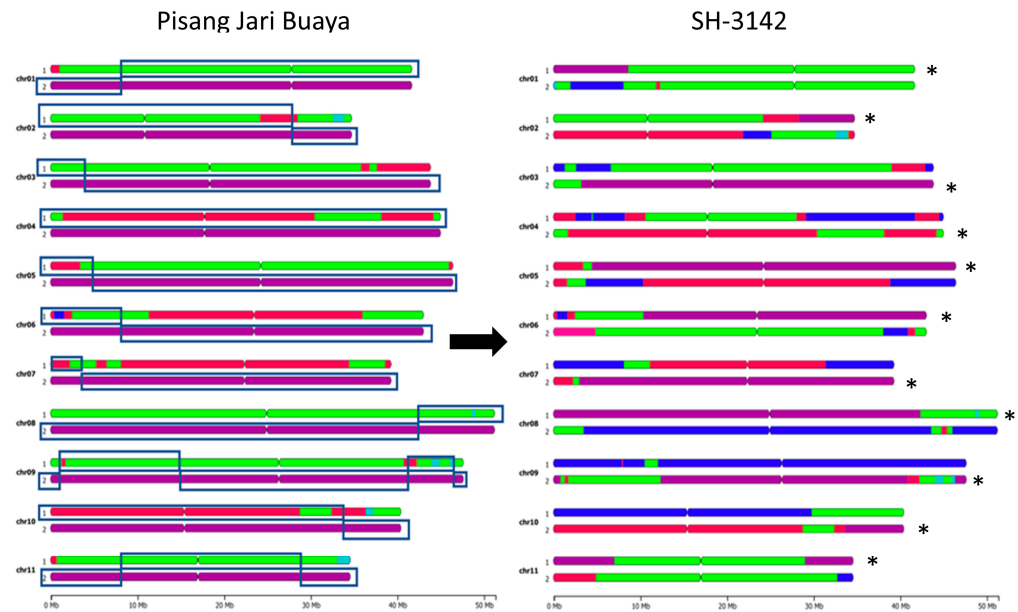

**Figure S1.** Genome Ancestry Mosaic Painting of the diploid AA genotype of Pisang Jari Buaya and SH-3142. Chromosomes inherited from Pisang Jari Buaya parent are indicated by \*.

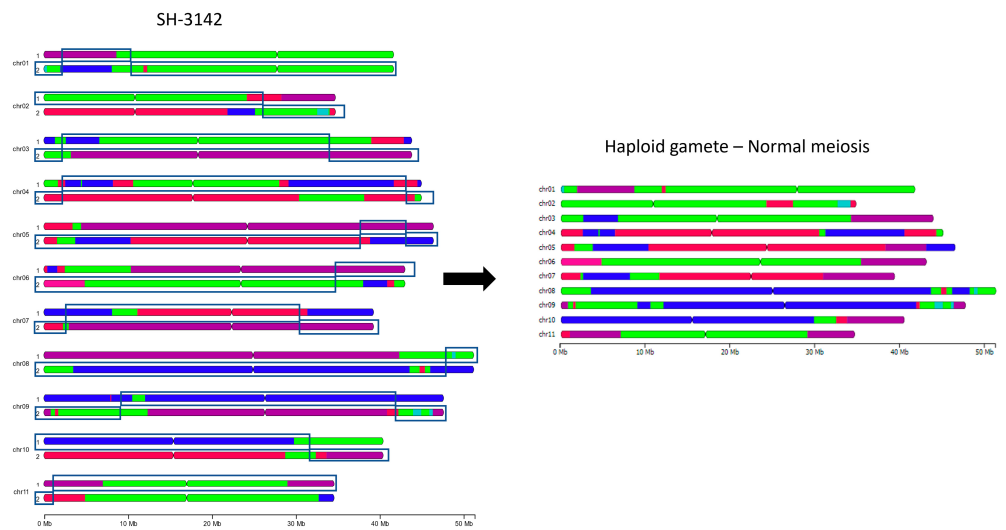

**Figure S2.** Genome Ancestry Mosaic Painting of the diploid AA genotype of 'SH-3142' and the haploid male gamete at the origin of FHIA-01. The colors of segments correspond to ancestral contributions.
